# Supplementary material for: Lactobacillus plantarum Y44 alleviates oxidative stress by regulating gut microbiota and colonic barrier function in Balb/C mice with subcutaneous d-galactose injection
Source: Royal Society of Chemistry journal article supplement (doi:10.1039/d0fo02794d), 2020-11-21
Supplement: d0fo02794d1.pdf [file d0fo02794d1.pdf]

Supplementary Information for online publication

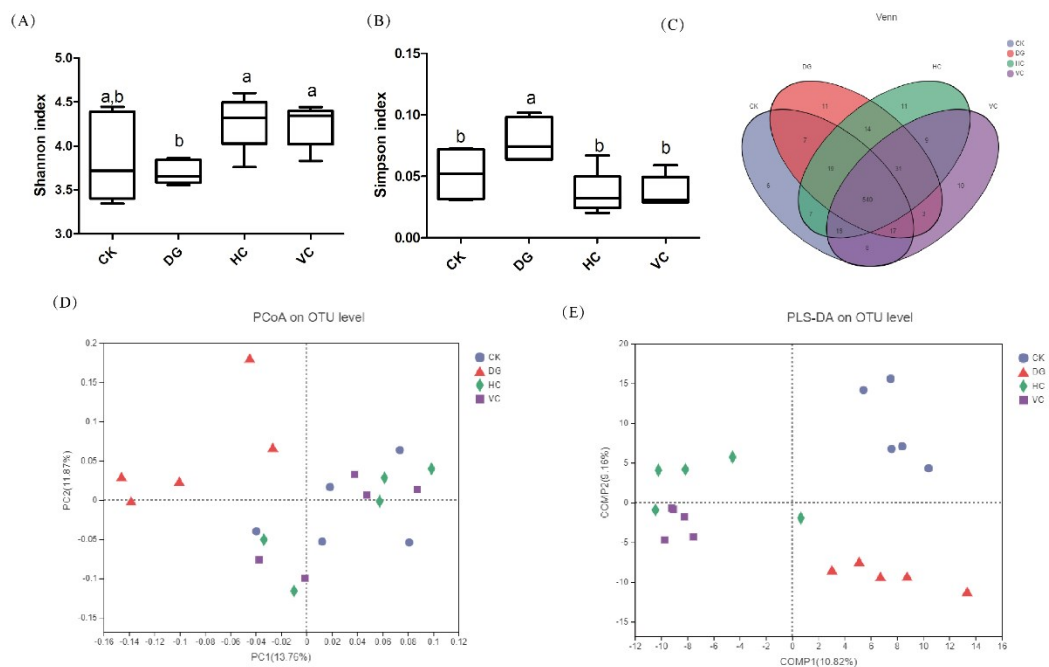

Fig. S1 Effect of *L. plantarum* Y44 administration on gut microbiota  $\alpha$ -diversity and  $\beta$ -diversity.

(A) Shannon index, (B) Simpson index, (C) Venn diagram of OUT numbers, (D) Principal coordinates analysis (PCoA) score plots, (E) Partial least squares discrimination analysis (PLS-DA) score plots; CK, Control group; DG, D-Galactose group; HC, High Concentration group; LC, Low Concentration group; VC, Ascorbic acid group.

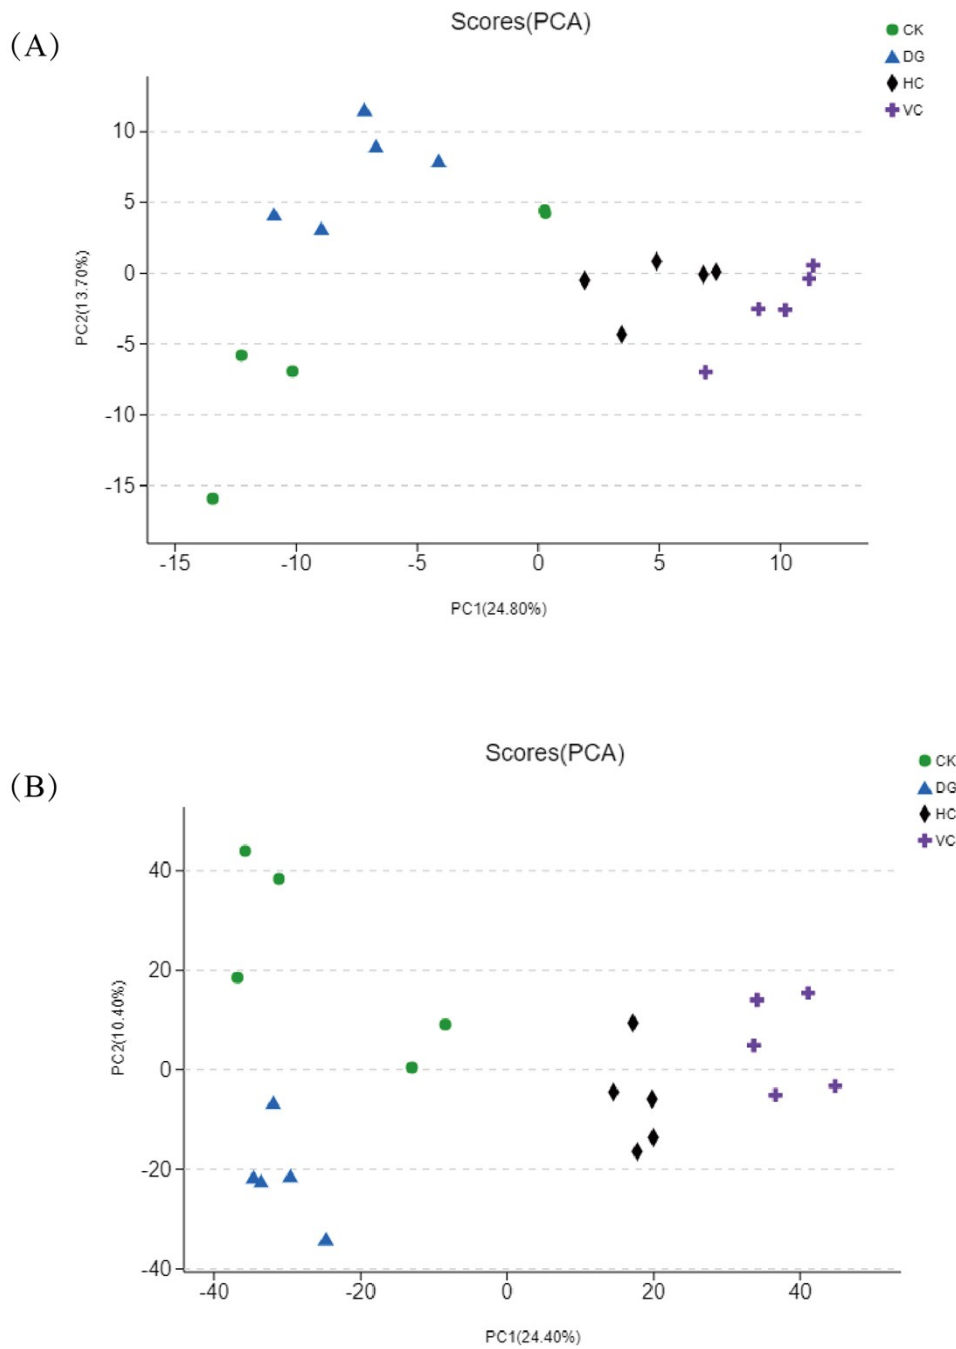

Fig. S2 Principal Component Analysis (PCA) score plots of serum samples from CK, DG, HC and VC group based on UPLC-MS in ESI+ (A) and ESI- modes (B). CK, Control group; DG, D-Galactose group; HC, High Concentration group; VC, Ascorbic acid group.

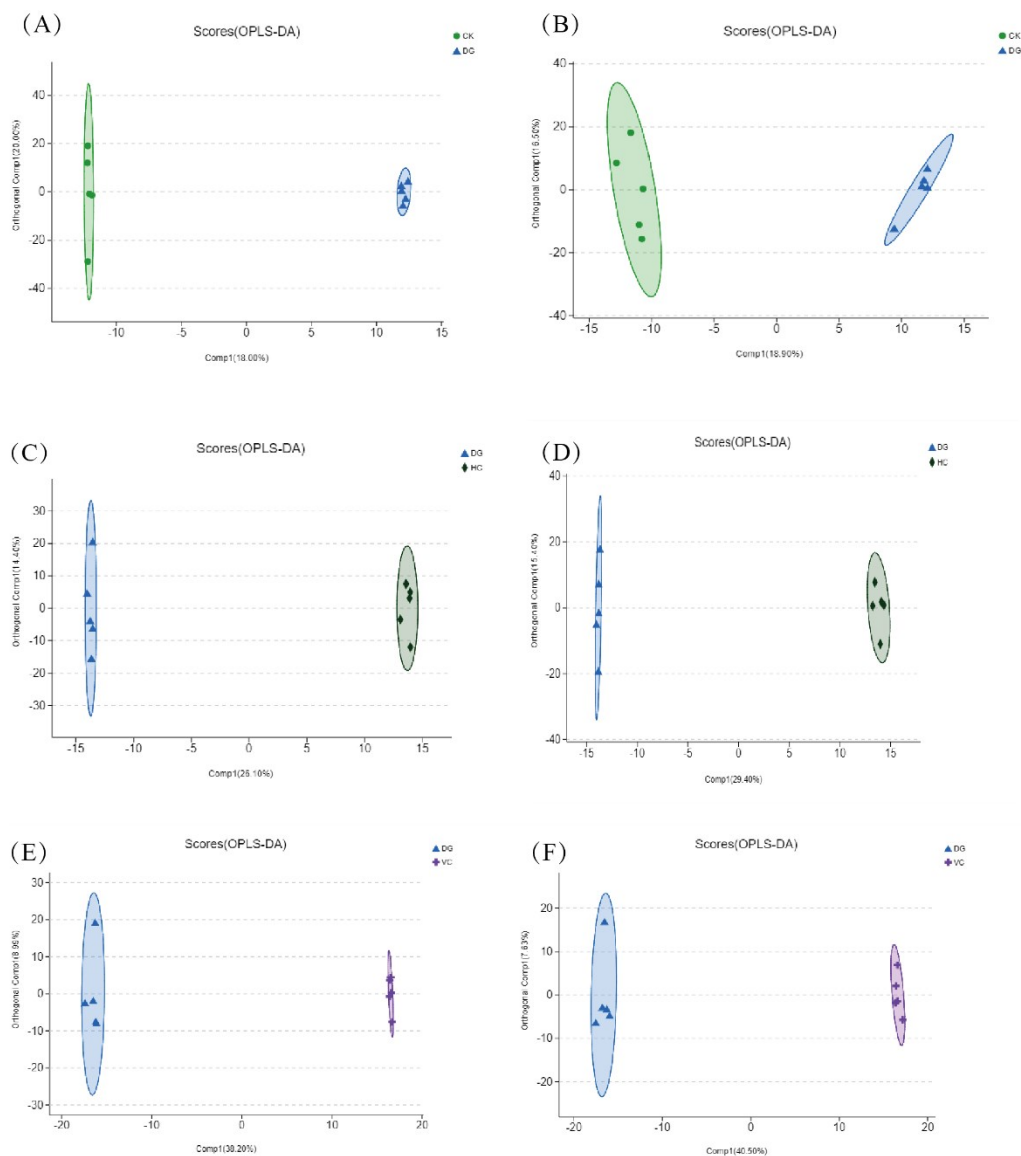

Fig. S3 OPLS-DA (orthogonal partial least-squares discrimination analysis) and permutation score plots of serum samples from CK, DG, HC and VC group. CK/DG group in (A) ESI+ model, (B) ESI- model; HC/DG group in ESI+ model (C), ESI- model (D); VC/DG group in ESI+ model (E), ESI- model (F). CK, Control group; DG, D-Galactose group; HC, High Concentration group; VC, Ascorbic acid group.

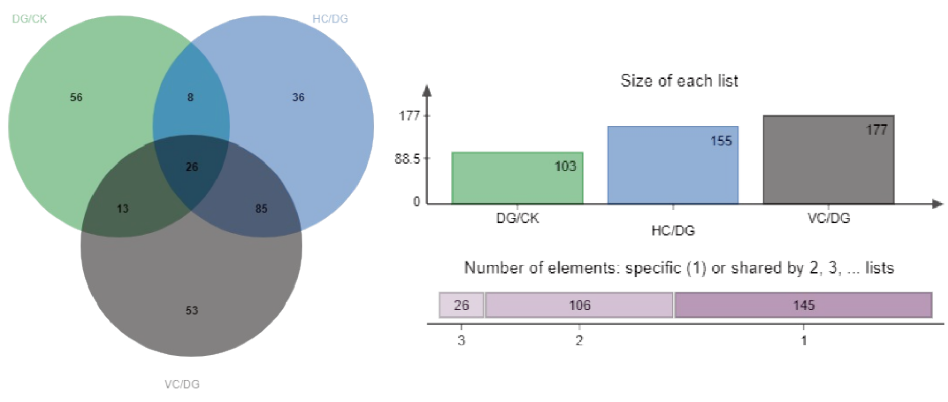

Fig. S4 Venn diagram of differential metabolites

es
